# Supplementary material for: The Polymers of Diethynylarenes—Is Selective Polymerization at One Acetylene Bond Possible? A Review
Source: MDPI journal article supplement (doi:10.3390/polym15051105), 2023-02-22
Supplement: s1 [file s1]

**Table S2.** Methods of synthesis of diethynylarenes polymers and the type of their intramolecular structure. <sup>a</sup>

| The Spacer Ar Structure | Synthesis Conditions or the Catalyst Used                                                                      | Declared Type of Structure                          | Original Authors Notes                                                                                    | References in Main Text                                                                                                                                                                       |
|-------------------------|----------------------------------------------------------------------------------------------------------------|-----------------------------------------------------|-----------------------------------------------------------------------------------------------------------|-----------------------------------------------------------------------------------------------------------------------------------------------------------------------------------------------|
| -Ph-Ph-                 | $[(RO)_3P]_n-CoHal$ , R = $Alk_{C\leq 6}$ , n=1-4, Hal = Cl, Br, I                                             | Crosslinked                                         | Contains phenylene fragments                                                                              | [64,71]<br>64. Korshak, V.V.; et al. US Patent US-3705131-A, filed 27.11.1970, and issued 1972.<br>71. Korshak, V.V., et al. <i>Dokl. Akad. Nauk SSSR</i> <b>1971</b> , <i>201</i> , 112.     |
| -Ph-Ph-                 | i-Bu <sub>3</sub> Al-TiCl <sub>4</sub>                                                                         | Crosslinked                                         | Contains phenylene fragments                                                                              | [148]<br>148. Sergeyev, V.A.; et al. <i>Polymer Science U.S.S.R.</i> <b>1980</b> , <i>22</i> , 2130–2135, doi:10.1016/0032-3950(80)90075-1.                                                   |
| -Ph-Ph-                 | $[Rh(cod)Cl]_2$ и $[Rh(cod)im]$ (cod = cis,cis-cyclo-octadiene; im = imidazole)                                | Crosslinked                                         | The presence of lath-<br>eral groups<br>–C <sub>6</sub> H <sub>4</sub> C <sub>6</sub> H <sub>4</sub> C≡CH | [18]<br>18. Bolasco, A.; et al. <i>Polymer</i> <b>1992</b> , <i>33</i> , 3049–3054, doi:10.1016/0032-3861(92)90094-D.                                                                         |
| -Ph-Ph-                 | $[Pd(PPh_3)_2Cl_2]$ и $[Pd(PPh_3)_2(DEDP)_2]$                                                                  | Crosslinked                                         | The presence of lath-<br>eral groups<br>–C <sub>6</sub> H <sub>4</sub> C <sub>6</sub> H <sub>4</sub> C≡CH | [18]<br>18. Bolasco, A.; et al. <i>Polymer</i> <b>1992</b> , <i>33</i> , 3049–3054, doi:10.1016/0032-3861(92)90094-D.                                                                         |
| -Ph-Ph-                 | Thermal polymerization                                                                                         | Often crosslinked                                   | Absence of groups<br>–C≡CH                                                                                | [18]<br>18. Bolasco, A.; et al. <i>Polymer</i> <b>1992</b> , <i>33</i> , 3049–3054, doi:10.1016/0032-3861(92)90094-D.                                                                         |
| -Ph-Ph-                 | $[Rh(cod)acac]$ and $[Rh(nbd)acac]$ (cod: cycloocta-1,5-diene; nbd: norborna-2,5-diene; acac: acetylacetonate) | Crosslinked                                         | Cross-linking with<br>arylene linkers. Polymers contain<br>–C≡CH groups                                   | [14]<br>14. Hanková, V.; et al. <i>Macromol. Rapid Commun.</i> <b>2012</b> , <i>33</i> , 158–163, doi:10.1002/marc.201100599.                                                                 |
| -Ph-Ph-                 | Co <sub>2</sub> (CO) <sub>8</sub>                                                                              | Often crosslinked by a cyclopolymerization reaction | Absence of groups<br>–C≡CH. The presence of 1,3,5-phenylene bridges.                                      | [112]<br>112. Yuan, S.; et al. <i>Chem. Commun.</i> <b>2010</b> , <i>46</i> , 4547, doi:10.1039/c0cc00235f.                                                                                   |
| -Ph-Ph-                 | Annealing at 100 °C on Au(111) substrate                                                                       | -                                                   | Forming of 2D networks on the Au(111) substrate                                                           | [19]<br>19. Zhou, H.; et al. <i>J. Am. Chem. Soc.</i> <b>2014</b> , <i>136</i> , 5567–5570, doi:10.1021/ja501308s.                                                                            |
| -Ph-Ph-                 | Thermal polymerization                                                                                         | -                                                   | Precursor of carbon/carbon composites                                                                     | [12]<br>12. Bilow, N.; et al. <i>SAMPE J.</i> <b>1982</b> , <i>18</i> , 19–24.                                                                                                                |
| -Ph-Ph-Ph-              | $[(RO)_3P]_n-CoHal$ , R = $Alk_{C\leq 6}$ , n=1-4, Hal = Cl, Br, I                                             | Crosslinked                                         | Contains phenylene fragments                                                                              | [64,71]<br>64. Korshak, V.V.; et al. US Patent US-3705131-A, filed 27.11.1970, and issued 1972.<br>71. Korshak, V.V., et al. <i>Dokl. Akad. Nauk SSSR</i> <b>1971</b> , <i>201</i> , 112–114. |
| Thiophenylene-2,5       | $[Rh(nbd)acac]$                                                                                                | Crosslinked                                         | Polyconjugated chains linked by thiophene-2,5-diyl bridges. The presence of –C≡CH groups.                 | [20]<br>20. Bondarev, D.; et al. <i>Eur. Polym. J.</i> <b>2017</b> , <i>92</i> , 213–219, doi:10.1016/j.eurpolymj.2017.04.042.                                                                |

|                             |                                                                                               |                   |                                                                                                                                       |                                                                                                                                                                                                                                                            |
|-----------------------------|-----------------------------------------------------------------------------------------------|-------------------|---------------------------------------------------------------------------------------------------------------------------------------|------------------------------------------------------------------------------------------------------------------------------------------------------------------------------------------------------------------------------------------------------------|
| Thiophenylene-2,5           | Co <sub>2</sub> (CO) <sub>8</sub>                                                             | Crosslinked       | Polycyclotrimerization with the formation of nodes of 1,2,4- and 1,3,5-substituted benzenes. The almost disappearance of groups –C≡CH | [20]<br>20. Bondarev, D.; et al. <i>Eur. Polym. J.</i> <b>2017</b> , <i>92</i> , 213–219, doi:10.1016/j.eurpolymj.2017.04.042.                                                                                                                             |
| Naphthylene-1,4             | Photo polymerization of crystals                                                              | Soluble           | Weak branching of polymer chains                                                                                                      | [169,170]<br>169. Rohde, O.; et al. <i>Makromol. Chem.</i> <b>1978</b> , <i>179</i> , 1999–2011, doi:10.1002/macp.1978.021790813.<br>170. Rohde, O.; et al. <i>Makromol. Chem.</i> <b>1978</b> , <i>179</i> , 2013–2029, doi:10.1002/macp.1978.021790814.  |
| Naphthylene-1,4             | Photo polymerization in solution                                                              | Soluble           | Weak branching of polymer chains                                                                                                      | [169,170]<br>169. Rohde, O.; et al. <i>Makromol. Chem.</i> <b>1978</b> , <i>179</i> , 1999–2011, doi:10.1002/macp.1978.021790813.<br>170. Rohde, O.; et al. <i>Makromol. Chem.</i> <b>1978</b> , <i>179</i> , 2013–2029, doi:10.1002/macp.1978.021790814.  |
| 2,3-Dichloronaphthylene-1,4 | Thermal polymerization                                                                        | Soluble           | Weak branching of polymer chains                                                                                                      | [[169,170]<br>169. Rohde, O.; et al. <i>Makromol. Chem.</i> <b>1978</b> , <i>179</i> , 1999–2011, doi:10.1002/macp.1978.021790813.<br>170. Rohde, O.; et al. <i>Makromol. Chem.</i> <b>1978</b> , <i>179</i> , 2013–2029, doi:10.1002/macp.1978.021790814. |
| 2,3-Dichloronaphthylene-1,4 | Photo polymerization                                                                          | Soluble           | Weak branching of polymer chains                                                                                                      | [169,170]<br>169. Rohde, O.; et al. <i>Makromol. Chem.</i> <b>1978</b> , <i>179</i> , 1999–2011, doi:10.1002/macp.1978.021790813.<br>170. Rohde, O.; et al. <i>Makromol. Chem.</i> <b>1978</b> , <i>179</i> , 2013–2029, doi:10.1002/macp.1978.021790814.  |
| Naphthylene-1,8             | MoCl <sub>5</sub> or WCl <sub>6</sub>                                                         | Partially soluble | Cyclization of –C≡CH groups to form a “semi-ladder” polymer with a conjugated system                                                  | [171]<br>171. Cho, H.N.; et al. <i>Polymer Bulletin</i> <b>1995</b> , <i>34</i> , 125–132, doi:10.1007/BF00316386.                                                                                                                                         |
| Naphthylene-1,8             | PdCl <sub>2</sub>                                                                             | Soluble           | Cyclization of –C≡CH groups to form a “semi-ladder” polymer with a conjugated system                                                  | [171]<br>171. Cho, H.N.; et al. <i>Polymer Bulletin</i> <b>1995</b> , <i>34</i> , 125–132, doi:10.1007/BF00316386.                                                                                                                                         |
| Naphthylene-1,8             | MoCl <sub>5</sub> /EtAlCl <sub>2</sub> (1:4) и WC1 <sub>6</sub> /(n-Bu) <sub>4</sub> Sn (1:4) | No information    | Probably, occur cyclization of –C≡CH groups to form a “semi-ladder” polymer with a conjugated system                                  | [171]<br>171. Cho, H.N.; et al. <i>Polymer Bulletin</i> <b>1995</b> , <i>34</i> , 125–132, doi:10.1007/BF00316386..                                                                                                                                        |
| Naphthylene-2,6             | TaCl <sub>5</sub> /Ph <sub>4</sub> Sn                                                         | Insoluble         | Hyperbranched cross-linked polycyclotrimers; there are few groups –C≡CH                                                               | [116]<br>116. Zukal, A.; et al. <i>Macromol. Chem. Phys.</i> <b>2013</b> , <i>214</i> , 2016–2026, doi:10.1002/macp.201300317.                                                                                                                             |
| Антрилен-2,6                | TaCl <sub>5</sub> /Ph <sub>4</sub> Sn                                                         | Insoluble         | Hyperbranched cross-linked polycyclotrimers; there are few groups –C≡CH                                                               | [116]<br>116. Zukal, A.; et al. <i>Macromol. Chem. Phys.</i> <b>2013</b> , <i>214</i> , 2016–2026, doi:10.1002/macp.201300317.                                                                                                                             |
| -Ph-O-Ph-                   | Thermal polymerization                                                                        | -                 | Precursor of carbon/carbon composites                                                                                                 | [12]<br>12. Bilow, N.; et al. <i>SAMPE J.</i> <b>1982</b> , <i>18</i> , 19–24.                                                                                                                                                                             |

|                                                                                                                                                                                           |                                 |                                             |                                                                   |                                                                                                                                               |
|-------------------------------------------------------------------------------------------------------------------------------------------------------------------------------------------|---------------------------------|---------------------------------------------|-------------------------------------------------------------------|-----------------------------------------------------------------------------------------------------------------------------------------------|
| -Ph-O-Ph-                                                                                                                                                                                 | Thermal polymerization in melt  | Soluble                                     | Linear polyene; in each link the group $-C_6H_4OC_6H_4C\equiv CH$ | [172]<br>172. Ratto, J.J.; et al. <i>J. Polym. Sci. Polym. Chem. Ed.</i> <b>1980</b> , <i>18</i> , 1035–1046, doi:10.1002/pol.1980.170180322. |
| -Ph-O-Ph-                                                                                                                                                                                 | $[(C_2H_5O)_3P]_4CoBr$          | Insoluble                                   | Polycyclotrimer                                                   | [66]<br>66. Korshak, V.V.; et al.. US Patent US-3705131-A, filed 27.11.1970, and issued 1972.                                                 |
| -Ph-O-Ph-                                                                                                                                                                                 | $i-Bu_3Al-TiCl_4$               | Insoluble                                   | Polycyclotrimer                                                   | [152]<br>15. Sergeyev, V.A.; et al. <i>Polymer Science U.S.S.R.</i> <b>1980</b> , <i>22</i> , 2130–2135, doi: 10.1016/0032-3950(80)90075-1.   |
| -Ph-Si(C <sub>n</sub> H <sub>2n+1</sub> ) <sub>2</sub> -Ph-                                                                                                                               | TaBr <sub>5</sub>               | Hyperbranched, soluble                      | The almost disappearance of groups $-C\equiv CH$                  | [173]<br>173. Liu, J.; et al. <i>Macromolecules</i> <b>2007</b> , <i>40</i> , 7473–7486, doi:10.1021/ma071062d.                               |
| -Ph-CH <sub>2</sub> -Ph-                                                                                                                                                                  | Thermal polymerization          |                                             | Precursor of carbon/carbon composites                             | [12]<br>12. Bilow, N.; et al. <i>SAMPE J.</i> <b>1982</b> , <i>18</i> , 19–24.                                                                |
| -Ph-C(Ph)=C(Ph)-Ph-;<br>-PhO(CH <sub>2</sub> ) <sub>6</sub> -OPh-;<br>-CH <sub>2</sub> OPh-CH <sub>2</sub> -PhOCH <sub>2</sub> -;<br>-C(O)-PhO-(CH <sub>2</sub> ) <sub>6</sub> -OPh-C(O)- | InCl <sub>3</sub> /2-iodophenol | Regioregular hyperbranched soluble polymers | Absence of groups $-C\equiv CH$                                   | [174]<br>174. Wang, Z.; et al. <i>Polym. Chem.</i> <b>2014</b> , <i>5</i> , 5890–5894, doi:10.1039/C4PY00859F.                                |

<sup>a</sup> information is taken from the primary sources indicated in the last column
