# Supplementary material for: The Polymers of Diethynylarenes—Is Selective Polymerization at One Acetylene Bond Possible? A Review
Source: MDPI journal article supplement (doi:10.3390/polym15051105), 2023-02-22
Supplement: s1 [file s1]

**Table S1.** Methods of synthesis of DEB polymers and the type of their intramolecular structure.<sup>a</sup>

| Synthesis Conditions or the Catalyst Used                                       | Declared Type of Structure                | Original Authors Notes                                                     | References in Main Text                                                                                                                                                                                                                                                                                                                                                                                                                                                                                                                                                                                                                                                                                                                                                                      |
|---------------------------------------------------------------------------------|-------------------------------------------|----------------------------------------------------------------------------|----------------------------------------------------------------------------------------------------------------------------------------------------------------------------------------------------------------------------------------------------------------------------------------------------------------------------------------------------------------------------------------------------------------------------------------------------------------------------------------------------------------------------------------------------------------------------------------------------------------------------------------------------------------------------------------------------------------------------------------------------------------------------------------------|
| <b>Poly-p-DEB</b>                                                               |                                           |                                                                            |                                                                                                                                                                                                                                                                                                                                                                                                                                                                                                                                                                                                                                                                                                                                                                                              |
| Solid-phase polymerization under pressure in combination with shear deformation | Crosslinked polymer                       | -                                                                          | [40]<br>40. Kapustyan, V.M.; et al. <i>Dokl. Akad. Nauk SSSR</i> 1968, 179, 627–628.                                                                                                                                                                                                                                                                                                                                                                                                                                                                                                                                                                                                                                                                                                         |
| UV-irradiation of crystals                                                      | Branched and crosslinked polymer          | -                                                                          | [41–46]<br>41. Broude, V.L.; et al. <i>Khim. Vys. Energ.</i> <b>1968</b> , 2, 165–171.<br>42. Gordon, D.A.; et al. <i>J. Photochem. Photobiol., A</i> 1995, 86, 253–257, doi:10.1016/1010-6030(94)03938-Q.<br>43. Gordon, D.A.; et al. <i>J Low Temp Phys</i> 2005, 139, 675–681, doi:10.1007/s10909-005-5479-6.<br>44. Gordon, D.A.; et al. <i>Low Temp. Phys.</i> 2009, 35, 269–274, doi:10.1063/1.3114591.<br>45. Gordon, D.A.; et al. <i>J. Polym. Sci. B Polym. Phys.</i> 1994, 32, 2405–2411, doi:10.1002/polb.1994.090321411.<br>46. Gordon, D.A et al. <i>Russ. J. Phys. Chem.</i> 2014, 88, 2129–2136, doi:10.1134/S0036024414120085.                                                                                                                                               |
| $\gamma$ -irradiation of crystals                                               | Branched and crosslinked polymer          | -                                                                          | [41,44–49]<br>41. Broude, V.L.; et al. <i>Khim. Vys. Energ.</i> <b>1968</b> , 2, 165–171.<br>44. Gordon, D.A.; et al. <i>J. Photochem. Photobiol., A</i> <b>1995</b> , 86, 253–257, doi:10.1016/1010-6030(94)03938-Q.<br>45. Gordon, D.A.; et al. <i>J Low Temp Phys</i> <b>2005</b> , 139, 675–681, doi:10.1007/s10909-005-5479-6.<br>46. Gordon, D.A.; et al. <i>Low Temp. Phys.</i> <b>2009</b> , 35, 269–274, doi:10.1063/1.3114591.<br>47. Gordon, D.A.; et al. <i>J. Polym. Sci. B Polym. Phys.</i> <b>1994</b> , 32, 2405–2411, doi:10.1002/polb.1994.090321411.<br>48. Gordon, D.A.; et al. <i>Russ. J. Phys. Chem.</i> <b>2014</b> , 88, 2129–2136, doi:10.1134/S0036024414120085.<br>49. Gordon, D.A et al. <i>High Energy Chem</i> 2014, 48, 5–10, doi:10.1134/S0018143914010068. |
| $\gamma$ -irradiation of crystals                                               | Soluble product                           | Composition: dimers, trimers, unreacted monomers                           | [27]<br>27. Li, Q.; et al. <i>Polym. Degrad. Stab.</i> 2015, 114, 81–88, doi:10.1016/j.polymdegradstab.2015.01.018.                                                                                                                                                                                                                                                                                                                                                                                                                                                                                                                                                                                                                                                                          |
| $\gamma$ -irradiation of a glassy solution of p-DEB in DMF                      | Branched polymer                          | -                                                                          | [48,49]<br>48. Gordon, D.A.; et al. <i>Russ. J. Phys. Chem.</i> 2014, 88, 2129–2136, doi:10.1134/S0036024414120085.<br>49. Gordon, D.A.; et al. <i>High Energy Chem</i> 2014, 48, 5–10, doi:10.1134/S0018143914010068.                                                                                                                                                                                                                                                                                                                                                                                                                                                                                                                                                                       |
| Polymerization with molecular chlorine at low temperature                       | Branched polymer                          | -                                                                          | [51–53]<br>51. Kozlovskii, A.A.; et al. <i>Russ. J. Phys. Chem.</i> 2010, 84, 1439–1444, doi:10.1134/S0036024410080285.<br>52. Gordon, D.A.; et al. <i>Low Temp. Phys.</i> 2013, 39, 565–570, doi:10.1063/1.4811266.<br>53. Gordon, D.A.; et al. <i>Russ. J. Phys. Chem. B</i> 2016, 10, 699–706, doi:10.1134/S1990793116040229.                                                                                                                                                                                                                                                                                                                                                                                                                                                             |
| Vacuum deposition on Cu(111) substrates and annealing at 175–350°C              | Covalent aggregates and meshes            | -                                                                          | [54]<br>54. Eichhorn, J.; et al. <i>Chem. Commun.</i> 2013, 49, 2900, doi:10.1039/c3cc40444g.                                                                                                                                                                                                                                                                                                                                                                                                                                                                                                                                                                                                                                                                                                |
| Thermal frontal polymerization of evaporating p-DEB                             | Carbon material with a graphite structure | Presence of microspheres with a narrow (100–200 nm) pore size distribution | [55]<br>55. Volkova, N.N.; et al. <i>IOP Conf. Ser.: Mater. Sci. Eng.</i> 2019, 693, 012027, doi:10.1088/1757-899X/693/1/012027.                                                                                                                                                                                                                                                                                                                                                                                                                                                                                                                                                                                                                                                             |

|                                                                                       |                                                  |                                                                           |                                                                                                                                                                                                                                                                                                                                                                                                                                          |
|---------------------------------------------------------------------------------------|--------------------------------------------------|---------------------------------------------------------------------------|------------------------------------------------------------------------------------------------------------------------------------------------------------------------------------------------------------------------------------------------------------------------------------------------------------------------------------------------------------------------------------------------------------------------------------------|
| Thermal melt polymerization                                                           | Crosslinked polymer                              | -                                                                         | [56,61]<br>56. Cherkashin, M.I.; et al. <i>Russ Chem Bull</i> 1967, 16, 2335–2337, doi:10.1007/BF00911839.<br>61. Berlin, A.A.; et al., USSR Patent SU-191800-A, filed 22.09.1965, and issued 1967.                                                                                                                                                                                                                                      |
| Thermal melt curing                                                                   | -                                                | The activation energies of the curing reaction o-, m-, p-DEB are compared | [62]<br>62. Sastri, S.B.; et al. <i>Macromolecules</i> 1993, 26, 6171–6174, doi:10.1021/ma00075a005.                                                                                                                                                                                                                                                                                                                                     |
| Reaction with iodine in the melt                                                      | Soluble product                                  | Complex composition of the branched co-polymer                            | [63]<br>63. Grigoryan, S.G.; et al. <i>Polym. Sci. U.S.S.R.</i> 1989, 31, 649–654, doi:10.1016/0032-3950(89)90246-3.                                                                                                                                                                                                                                                                                                                     |
| Boiling a solution of p-DEB in DMF (Bp=153°C)                                         | Branched polymer                                 | -                                                                         | [64]<br>64. Tseng, W.-C.; et al. <i>Polym. Degrad. Stab.</i> 2009, 94, 2149–2156, doi:10.1016/j.polymdegradstab.2009.09.008.                                                                                                                                                                                                                                                                                                             |
| The thermal reaction. The technique is not complete                                   | The gel was transferred to a crosslinked polymer | A composite with fir powder was obtained                                  | [65]<br>65. Wang, Y.-G.; et al. <i>Chinese Journal of Applied Chemistry</i> 2010, 27, 418–423, doi:10.3724/SP.J.1095.2010.90354.                                                                                                                                                                                                                                                                                                         |
| UV-light or $\gamma$ - <sup>60</sup> Co irradiations of p-DEB solutions in ethanol    | Lack of polymerization                           | -                                                                         | [41,43]<br>41. Broude, V.L.; et al. <i>Khim. Vys. Energ.</i> 1968, 2, 165–171.<br>43. Gordon, D.A.; et al. <i>J Low Temp Phys</i> 2005, 139, 675–681, doi:10.1007/s10909-005-5479-6.                                                                                                                                                                                                                                                     |
| (i-C <sub>4</sub> H <sub>9</sub> ) <sub>3</sub> Al—TiCl <sub>4</sub> (Al/Ti=0.5 mol)  | Crosslinked polymer                              | -                                                                         | [68,69]<br>68. Ermakova, V.D.; et al. <i>Russ Chem Bull</i> 1972, 21, 1139–1141, doi:10.1007/BF00853790.<br>69. Yermakova, V.D.; et al. <i>Polym. Sci. U.S.S.R.</i> 1974, 16, 752–761, doi:10.1016/0032-3950(74)90391-8.                                                                                                                                                                                                                 |
| (i-C <sub>4</sub> H <sub>9</sub> ) <sub>3</sub> Al—TiCl <sub>4</sub> (Al/Ti=0.5 mol)  | Crosslinked polymer                              | The structure contains phenylene fragments                                | [70,71]<br>70. Korshak, V.V.; et al. <i>Vysokomol. Soedin., Ser. B</i> 1972, 14, 886–888.<br>71. Sergeyev, V.A et al. <i>Appl. Polym. Symp.</i> 1975, 26, 237–248.                                                                                                                                                                                                                                                                       |
| n-Bu <sub>4</sub> Ti/(Et <sub>3</sub> Al) <sub>4</sub>                                | Soluble polymer                                  | Declaring a linear structure                                              | [135]<br>135. Ai, H.; Koizumi, et al, US Patent US-4667006-A, 1987.                                                                                                                                                                                                                                                                                                                                                                      |
| [(C <sub>2</sub> H <sub>5</sub> O) <sub>3</sub> P] <sub>4</sub> -CoI                  | Crosslinked polymer                              | The structure contains phenylene fragments                                | [66,67,74]<br>66. Korshak, V.V.; et al. US Patent US-3705131-A, filed 27.11.1970, and issued 1972.<br>67. Korshak, V.V et al. <i>Dokl. Akad. Nauk SSSR</i> 1971, 201, 112.<br>74. Korshak, V.V et al. <i>Vysokomol. Soedin., Ser. B</i> 1971, 13, 973.                                                                                                                                                                                   |
| [(C <sub>2</sub> H <sub>5</sub> O) <sub>3</sub> P] <sub>4</sub> -CoBr                 | Branched polymer with phenylene fragments        | The mechanism of polymerization is proposed                               | [75]<br>75. Korshak, V.V.; et al. <i>Polym. Sci. U.S.S.R.</i> 1973, 15, 28–36, doi:10.1016/0032-3950(73)90262-1.                                                                                                                                                                                                                                                                                                                         |
| [(RO) <sub>3</sub> P] <sub>n</sub> -CoHal, (R = AlkC <sub>26</sub> , Hal = Cl, Br, I) | Branched polymer                                 | The structure contains phenylene fragments                                | [76-79]<br>76. Korshak, V.V.; et al. <i>Polym. Sci. U.S.S.R.</i> 1973, 15, 2465–2470, doi: 10.1016/0032-3950(73)90002-6.<br>77. Korshak, V.V. <i>Pure Appl. Chem.</i> 1974, 39, 65–80, doi: 10.1351/pac197439010065.<br>78. Korshak, V.V. <i>Polym. Sci. U.S.S.R.</i> 1974, 16, 1066–1087, doi:10.1016/0032-3950(74)90328-1.<br>79. Sergeev, V.A.; et al. <i>Russ. Chem. Rev.</i> 1979, 48, 79–93, doi: 10.1070/RC1979v048n01ABEH002304. |
| Ni(Acac) <sub>2</sub> -Ph <sub>3</sub> P, where acac: acetylacetonate                 | Branched polymer                                 | The structure contains phe-                                               | [80-83]<br>80. Cessna, L.C.Jr. US Patent US-3882073-A, filed                                                                                                                                                                                                                                                                                                                                                                             |

|                                                                                                      |                                                     |                                                                                                 |                                                                                                                                                                                                                                                                                                                                                                                                                                                                                                   |
|------------------------------------------------------------------------------------------------------|-----------------------------------------------------|-------------------------------------------------------------------------------------------------|---------------------------------------------------------------------------------------------------------------------------------------------------------------------------------------------------------------------------------------------------------------------------------------------------------------------------------------------------------------------------------------------------------------------------------------------------------------------------------------------------|
|                                                                                                      |                                                     | phenylene fragments                                                                             | 18.12.1972, and issued 1975.<br>81. Cessna, L.C. US Patent US-4026859-A, filed 03.06.1974, and issued 1977.<br>82. Jabloner, H. US Patent US-4070333-A, filed 02.01.1974, and issued 1978.<br>83. Jabloner, H. US Patent US-4097460-A, filed 23.07.1971, and issued 1978.                                                                                                                                                                                                                         |
| Ni(Acac) <sub>2</sub> -Ph <sub>3</sub> P                                                             | Linear polymer                                      | -                                                                                               | [30]<br>30. Sergeyev, V.A.; et al. <i>Polym. Sci. U.S.S.R.</i> 1986, 28, 2638–2641, doi:10.1016/0032-3950(86)90298-4.                                                                                                                                                                                                                                                                                                                                                                             |
| Ni(Acac) <sub>2</sub> -Ph <sub>3</sub> P                                                             | Branched polymer                                    | -                                                                                               | [84–88]<br>84. Kirilenko, Yu.K.; et al. USSR Patent SU-771207-A, filed 17.10.1978, and issued 1980.<br>85. Kirilenko, Yu.K.; et al. USSR Patent SU-833994-A, filed 25.10.1979, and issued 1981.<br>86. Kirilenko, Yu.K.; et al. <i>Polym. Sci. U.S.S.R.</i> 1984, 26, 2122–2127, doi:10.1016/0032-3950(84)90455-6.<br>87. Cherkashin, M.I.; et al. <i>Vysokomol. Soedin., Ser. B</i> 1985, 27, 9–11.<br>88. Kirilenko, Yu.K.; et al. <i>Fibre Chem</i> 1985, 16, 429–430, doi:10.1007/BF00546265. |
| Ni(C <sub>5</sub> H <sub>7</sub> O <sub>2</sub> ) <sub>2</sub> -Ph <sub>3</sub> P                    | Branched polymer                                    | The structure contains phenylene fragments                                                      | [64]<br>64. Tseng, W.-C.; et al. <i>Polym. Degrad. Stab.</i> 2009, 94, 2149–2156, doi:10.1016/j.polymdegradstab.2009.09.008.                                                                                                                                                                                                                                                                                                                                                                      |
| Ni(C <sub>5</sub> H <sub>7</sub> O <sub>2</sub> ) <sub>2</sub> -Ph <sub>3</sub> P                    | Branched polymer                                    | The structure contains phenylene fragments                                                      | [89]<br>89. Oishi, S.S.; et al. <i>Polímeros</i> 2014, 24, 541–546, doi:10.1590/0104-1428.1623.                                                                                                                                                                                                                                                                                                                                                                                                   |
| Rh(cod)acac and Rh(nbd)acac (cod: cycloocta-1,5-diene; nbd: norborna-2,5-diene; acac: acetylacetone) | Crosslinked polymer                                 | Cross-linking with aryene linkers. Polymers contain –C≡C–H groups                               | [14,15]<br>14. Hanková, V.; et al. <i>Macromol. Rapid Commun.</i> 2012, 33, 158–163, doi:10.1002/marc.201100599.<br>15. Slováková, E.; et al. <i>Macromol. Chem. Phys.</i> 2014, 215, 1855–1869, doi:10.1002/macp.201400198.                                                                                                                                                                                                                                                                      |
| [Rh(nbd)Cl] <sub>2</sub> /Et <sub>3</sub> N                                                          | Crosslinked polymer                                 | Cross-linking with aryene linkers. Polymers contain –C≡C–H groups                               | [15]<br>15. Slováková, E.; et al. <i>Macromol. Chem. Phys.</i> 2014, 215, 1855–1869, doi:10.1002/macp.201400198.                                                                                                                                                                                                                                                                                                                                                                                  |
| Rh(nbd)acac                                                                                          | Crosslinked polymer                                 | Cross-linking with aryene linkers. Evaluation of the catalytic activity of acidic hydrogen ≡C–H | [90,91]<br>90. Sekerová, L.; et al. <i>Tetrahedron</i> 2019, 75, 2877–2882, doi:10.1016/j.tet.2019.04.013.<br>91. Sekerová, L.; et al. <i>Chem. Eur. J.</i> 2018, 24, 14742–14749, doi:10.1002/chem.201802432                                                                                                                                                                                                                                                                                     |
| Rh-based catalyst                                                                                    | -                                                   | Review                                                                                          | [9]<br>9. Sedláček, J.; et al. <i>Polym. Rev.</i> 2017, 57, 31–51, doi: 10.1080/15583724.2016.1144207.                                                                                                                                                                                                                                                                                                                                                                                            |
| Ni(PPh <sub>3</sub> ) <sub>2</sub> (C≡CC <sub>6</sub> H <sub>4</sub> C≡CH) <sub>2</sub>              | The structure of a linear trans-polyene is declared | Lack of structure studies. Humidity sensors. Doping by HClO <sub>4</sub>                        | [92–94]<br>92. Casalbore-Miceli, G. <i>Solid State Ionics</i> 1997, 100, 217–224, doi: 10.1016/S0167-2738(97)00349-4.<br>93. Yang, M.; et al. <i>Chin. Chem. Lett.</i> 1998, 9, 223–225.<br>94. Zhan, X.; et al. <i>Synth. Met.</i> 1998, 94, 249–253, doi: 10.1016/S0379-6779(98)00007-1.                                                                                                                                                                                                        |
| Ni(PPh <sub>3</sub> ) <sub>2</sub> (C≡CC <sub>6</sub> H <sub>4</sub> C≡CH) <sub>2</sub>              | Branched                                            | Humidity                                                                                        | [95]                                                                                                                                                                                                                                                                                                                                                                                                                                                                                              |

|                                                                                                                                                                                                                                                                                                                                                                                                                       |                                                                                                                                                        |                                                                                                                                                                                                      |                                                                                                                                                                         |
|-----------------------------------------------------------------------------------------------------------------------------------------------------------------------------------------------------------------------------------------------------------------------------------------------------------------------------------------------------------------------------------------------------------------------|--------------------------------------------------------------------------------------------------------------------------------------------------------|------------------------------------------------------------------------------------------------------------------------------------------------------------------------------------------------------|-------------------------------------------------------------------------------------------------------------------------------------------------------------------------|
|                                                                                                                                                                                                                                                                                                                                                                                                                       | trans-polyene                                                                                                                                          | sensors                                                                                                                                                                                              | 95. Yang, M.; et al. <i>J. Appl. Polym. Sci.</i> <b>1999</b> , <i>74</i> , 2010–2015, doi: 10.1002/(SICI)1097-4628(19991121)74:8<2010::AID-AP P16>3.0.CO;2-1.           |
| $\text{Ni}(\text{PPh}_3)_2(\text{C}\equiv\text{CC}_6\text{H}_4\text{C}\equiv\text{CH})_2$                                                                                                                                                                                                                                                                                                                             | The structure of a linear trans-polyene is declared                                                                                                    | Optical, photo-luminescent and electro-luminescent properties                                                                                                                                        | [96]<br>96. Yu, G.; et al. <i>Thin Solid Films</i> <b>2000</b> , <i>363</i> , 126–129, doi: 10.1016/S0040-6090(99)01016-0.                                              |
| $\text{Ni}(\text{PPh}_3)_2(\text{C}\equiv\text{CC}_6\text{H}_4\text{C}\equiv\text{CH})_2$                                                                                                                                                                                                                                                                                                                             | Branched trans-polyene                                                                                                                                 | Photoluminescence, electro-luminescence and conductivity of doped by $\text{HClO}_4$ , $\text{H}_2\text{SO}_4$ , $\text{HBF}_4$ , $\text{I}_2$ , $\text{FeCl}_3$ , $\text{CH}_3\text{COOH}$ polymers | [97]<br>97. Zhan, X.; et al. <i>Adv. Mater.</i> <b>2000</b> , <i>12</i> , 51–53, doi: 10.1002/(SICI)1521-4095(200001)12:1<51::AID-ADMA51>3.0.CO;2-J.                    |
| $\text{Ni}(\text{PPh}_3)_2(\text{C}\equiv\text{CC}_6\text{H}_4\text{C}\equiv\text{CH})_2$                                                                                                                                                                                                                                                                                                                             | Branched trans-polyene                                                                                                                                 | -                                                                                                                                                                                                    | [98]<br>98. Yang, M.; et al. <i>Chin. J. Polym. Sci.</i> <b>2001</b> , <i>19</i> , 303–309.                                                                             |
| $\text{Ni}(\text{PPh}_3)_2(\text{C}\equiv\text{CC}_6\text{H}_4\text{C}\equiv\text{CH})_2$                                                                                                                                                                                                                                                                                                                             | Linear trans-polyene on the scheme                                                                                                                     | Lack of structure studies.                                                                                                                                                                           | [100]<br>100. Zhan, X.; et al. <i>J. Mol. Catal. A: Chem.</i> <b>2001</b> , <i>169</i> , 27–31, doi:10.1016/S1381-1169(00)00559-8.                                      |
| $\text{Ni}(\text{PPh}_3)_2(\text{C}\equiv\text{CC}_6\text{H}_4\text{C}\equiv\text{CH})_2$                                                                                                                                                                                                                                                                                                                             | Branched trans-polyene                                                                                                                                 | Doping by $\text{FeCl}_3$ . Conductivity                                                                                                                                                             | [102]<br>102. Zhan, X.; et al. <i>Eur. Polym. J.</i> <b>2002</b> , <i>38</i> , 2057–2061, doi: 10.1016/S0014-3057(02)00091-5.                                           |
| $\text{Ni}(\text{PPh}_3)_2(\text{C}\equiv\text{CC}_6\text{H}_4\text{C}\equiv\text{CH})_2$                                                                                                                                                                                                                                                                                                                             | A linear trans-polyene is declared, but the synthesis is carried out in accordance with [95], where the structure of a branched trans-polyene is given | Humidity sensors                                                                                                                                                                                     | [103]<br>103. Li, Y.; et al. <i>Sens. Actuators, B</i> <b>2007</b> , <i>122</i> , 560–563, doi: 10.1016/j.snb.2006.06.031.                                              |
| $\text{Ni}(\text{PPh}_3)_2(\text{C}\equiv\text{CCH}_2\text{OCOCH}_3)_2$ ,<br>$\text{Ni}(\text{PBu}_3)_2(\text{C}\equiv\text{CC}_6\text{H}_4\text{C}\equiv\text{CH})_2$ ,<br>$\text{Ni}(\text{PBu}_3)_2(\text{C}\equiv\text{CCH}_2\text{OCOCH}_3)_2$                                                                                                                                                                   | Branched polymer                                                                                                                                       | -                                                                                                                                                                                                    | [99]<br>99. Zhan, X.; et al. <i>Macromol. Rapid Commun.</i> <b>2001</b> , <i>22</i> , 530–534, doi: 10.1002/1521-3927(20010401)22:7<530::AID-MARC530>3.0.CO;2-N.        |
| $\text{NiL}_2(\text{C}\equiv\text{CR})_2$ ; $\text{NiL}_2(\text{C}\equiv\text{CR})\text{Cl}$ and $\text{Ni}(\text{PBu}_3)_2\text{Cl}_2$ , where $\text{L}_2 = (\text{PPh}_3)_2$ , $(\text{PBu}_3)_2$ and $\text{Ph}_2\text{PCH}_2\text{CH}_2\text{PPh}_2$ ; $\text{R} = \text{p-C}_6\text{H}_4\text{C}\equiv\text{CH}$ , $\text{C}_6\text{H}_5$ , $\text{H}$ , $\text{CH}_2\text{OH}$ and $\text{CH}_2\text{OCOCH}_3$ | Soluble polymer. Structure is not shown.                                                                                                               | Lack of structure studies.                                                                                                                                                                           | [100]<br>100. Zhan, X.; et al. <i>J. Mol. Catal. A: Chem.</i> <b>2001</b> , <i>169</i> , 27–31, doi: 10.1016/S1381-1169(00)00559-8.                                     |
| $(\pi\text{-C}_5\text{H}_5)\text{LNi}(\text{C}\equiv\text{CR})$ (where $\text{L} = \text{PPh}_3$ , $\text{PBu}_3$ ; $\text{R} = \text{p-C}_6\text{H}_4\text{C}\equiv\text{CH}$ , $\text{C}_6\text{H}_5$ , $\text{H}$ )                                                                                                                                                                                                | Branched polymer                                                                                                                                       | -                                                                                                                                                                                                    | [104]<br>104. Zhan, X.; et al. <i>Macromol. Rapid Commun.</i> <b>2000</b> , <i>21</i> , 1263–1266, doi: 10.1002/1521-3927(20001101)21:17<1263::AID-MARC1263>3.0.CO;2-X. |
| $(\pi\text{-C}_5\text{H}_5)(\text{PPh}_3)\text{Ni}(\text{C}\equiv\text{CC}_6\text{H}_4\text{C}\equiv\text{CH})$                                                                                                                                                                                                                                                                                                       | Branched trans-polyene                                                                                                                                 | -                                                                                                                                                                                                    | [105]<br>105. Zhan, X.; et al. <i>Eur. Polym. J.</i> <b>2001</b> , <i>37</i> , 1649–1654, doi: 10.1016/S0014-3057(01)00016-7.                                           |
| $(\pi\text{-C}_5\text{H}_5)(\text{PPh}_3)\text{Ni}(\text{C}\equiv\text{CC}_6\text{H}_4\text{C}\equiv\text{CH})$                                                                                                                                                                                                                                                                                                       | Branched trans-polyene                                                                                                                                 | Doping by $\text{I}_2$ . Conductivity.                                                                                                                                                               | [106]<br>106. Zhan, X.; et al. <i>Eur. Polym. J.</i> <b>2002</b> , <i>38</i> ,                                                                                          |

|                                                                                                                                                                                                                                                                                                                                                                                        |                                              |                                                                                                    |                                                                                                                                                                 |
|----------------------------------------------------------------------------------------------------------------------------------------------------------------------------------------------------------------------------------------------------------------------------------------------------------------------------------------------------------------------------------------|----------------------------------------------|----------------------------------------------------------------------------------------------------|-----------------------------------------------------------------------------------------------------------------------------------------------------------------|
|                                                                                                                                                                                                                                                                                                                                                                                        |                                              |                                                                                                    | 2349–2353, doi: 10.1016/S0014-3057(02)00144-1.                                                                                                                  |
| Unknown Ni catalyst                                                                                                                                                                                                                                                                                                                                                                    | Branched trans-polyene structure is declared | Lack of structure studies. Comparison of the curing processes of soluble poly-p-DEB and poly-m-DEB | [107]<br>107. Ding, X.; et al. <i>J. East China Univ. Sci. Technol.</i> <b>2001</b> , <i>27</i> , 161–164.                                                      |
| Unknown Ni catalyst                                                                                                                                                                                                                                                                                                                                                                    | Branched trans-polyene structure is declared | Lack of structure studies. The study of the rheology of prepolymers synthesized in [100]           | [108]<br>108. Ding, X.; et al. <i>J. Funct. Polym.</i> <b>2001</b> , <i>14</i> , 105–108.                                                                       |
| $(\pi\text{-C}_5\text{H}_5)(\text{PPh}_3)\text{NiCl}$                                                                                                                                                                                                                                                                                                                                  | Soluble polymer. Structure not specified     | Lack of structure studies.                                                                         | [100]<br>100. Zhan, X.; et al. <i>J. Mol. Catal. A: Chem.</i> <b>2001</b> , <i>169</i> , 27–31, doi: 10.1016/S1381-1169(00)00559-8.                             |
| $\text{Ni}(\text{PPh}_3)_2\text{Cl}_2$                                                                                                                                                                                                                                                                                                                                                 | Catalyst not active                          |                                                                                                    | [100]<br>100. Zhan, X.; et al. <i>J. Mol. Catal. A: Chem.</i> <b>2001</b> , <i>169</i> , 27–31, doi: 10.1016/S1381-1169(00)00559-8.                             |
| $\text{Pd}(\text{PPh}_3)_2(\text{C}\equiv\text{CCH}_2\text{OH})_2$                                                                                                                                                                                                                                                                                                                     | Branched trans-polyene                       | -                                                                                                  | [109]<br>109. Zhan, X.; et al. <i>J. Mol. Catal. A: Chem.</i> <b>2002</b> , <i>184</i> , 139–145, doi:10.1016/S1381-1169(02)00006-7.                            |
| $\text{Pd}(\text{PPh}_3)_2(\text{C}\equiv\text{CC}_6\text{H}_4\text{C}\equiv\text{CH})_2$                                                                                                                                                                                                                                                                                              | Branched trans-polyene                       | -                                                                                                  | [99]<br>96. Zhan, X.; et al. <i>Macromol. Rapid Commun.</i> <b>2001</b> , <i>22</i> , 530–534, doi:10.1002/1521-3927(20010401)22:7<530::AID-MARC530>3.0.CO;2-N. |
| $\text{Pd}(\text{PPh}_3)_2(\text{C}\equiv\text{CC}_6\text{H}_4\text{C}\equiv\text{CH})_2$                                                                                                                                                                                                                                                                                              | Branched trans-polyene                       | Third-order nonlinear optical properties                                                           | [110]<br>110. Zhan, X.; et al. <i>Macromol. Rapid Commun.</i> <b>2001</b> , <i>22</i> , 358–362, doi:10.1002/1521-3927(20010301)22:53.3.CO;2-O.                 |
| $\text{Pd}(\text{PBU}_3)_2(\text{C}\equiv\text{CC}_6\text{H}_4\text{C}\equiv\text{CH})_2$                                                                                                                                                                                                                                                                                              | Catalyst not active                          |                                                                                                    | [99]<br>96. Zhan, X.; et al. <i>Macromol. Rapid Commun.</i> <b>2001</b> , <i>22</i> , 530–534, doi:10.1002/1521-3927(20010401)22:7<530::AID-MARC530>3.0.CO;2-N. |
| $\text{Pd}(\text{PPh}_3)_2(\text{C}\equiv\text{CR})_2$ $\text{R} = \text{p-C}_6\text{H}_4\text{C}\equiv\text{CH}, \text{C}_6\text{H}_5, \text{H}, \text{CH}_2\text{OH}, \text{CH}_2\text{OCOCH}_3, \text{CH}_2\text{OCOC}_6\text{H}_5, \text{CH}_2\text{OCOC}_6\text{H}_4\text{OH-O}$                                                                                                  | Probably, branched trans-polyene             | Lack of structure studies.                                                                         | [111]<br>111. Zhan, X.; et al. <i>J. Mol. Catal. A: Chem.</i> <b>2001</b> , <i>169</i> , 63–66, doi:10.1016/S1381-1169(01)00037-1.                              |
| $\text{Pd}(\text{PBU}_3)_2(\text{C}\equiv\text{CCH}_2\text{OH})_2$<br>$\text{Pd}(\text{PBU}_3)_2(\text{C}\equiv\text{CC}_6\text{H}_4\text{C}\equiv\text{CH})_2$                                                                                                                                                                                                                        | Catalyst not active                          |                                                                                                    | [111]<br>111. Zhan, X.; et al. <i>J. Mol. Catal. A: Chem.</i> <b>2001</b> , <i>169</i> , 63–66, doi:10.1016/S1381-1169(01)00037-1                               |
| $\text{Co}(\text{PPh}_3)_2(\text{C}\equiv\text{CC}_6\text{H}_5)_2$<br>$\text{Ni}(\text{PPh}_3)_2(\text{C}\equiv\text{CC}_6\text{H}_5)_2$<br>$\text{Pd}(\text{PPh}_3)_2(\text{C}\equiv\text{CC}_6\text{H}_5)_2$<br>$\text{Co}(\text{PBU}_3)_2\text{Cl}_2$<br>$\text{Ni}(\text{PBU}_3)_2\text{Cl}_2$<br>$\text{Ni}(\text{PPh}_3)_2\text{Cl}_2$<br>$\text{Pd}(\text{PPh}_3)_2\text{Cl}_2$ | Branched trans-polyene                       |                                                                                                    | 109. Zhan, X.; et al. <i>J. Mol. Catal. A: Chem.</i> <b>2002</b> , <i>184</i> , 139–145, doi:10.1016/S1381-1169(02)00006-7.                                     |
| $\text{Pt}(\text{PPh}_3)_2(\text{C}\equiv\text{CC}_6\text{H}_5)_2$<br>$\text{Pd}(\text{PBU}_3)_2\text{Cl}_2$<br>$\text{Pt}(\text{PBU}_3)_2\text{Cl}_2$<br>$\text{Co}(\text{PPh}_3)_2\text{Cl}_2$                                                                                                                                                                                       | Catalyst not active                          |                                                                                                    | 109. Zhan, X.; et al. <i>J. Mol. Catal. A: Chem.</i> <b>2002</b> , <i>184</i> , 139–145, doi:10.1016/S1381-1169(02)00006-7.                                     |

|                                                                                                                                |                                                    |                                                                                                                       |                                                                                                                                                                                       |
|--------------------------------------------------------------------------------------------------------------------------------|----------------------------------------------------|-----------------------------------------------------------------------------------------------------------------------|---------------------------------------------------------------------------------------------------------------------------------------------------------------------------------------|
| Pt(PPh <sub>3</sub> ) <sub>2</sub> Cl <sub>2</sub>                                                                             |                                                    |                                                                                                                       |                                                                                                                                                                                       |
| Co <sub>2</sub> (CO) <sub>8</sub>                                                                                              | Insoluble polymer                                  | The polymer contains phenylene fragments and no $-C\equiv C-H$ groups                                                 | [112]<br>112. Yuan, S.; et al. <i>Chem. Commun.</i> <b>2010</b> , 46, 4547, doi:10.1039/c0cc00235f.                                                                                   |
| Mo(CO) <sub>6</sub> +YΦ                                                                                                        | Soluble polymer                                    | A linear polyene structure is declared. There are $-C\equiv C-H$ groups                                               | [135]<br>135. Ai, H.; Koizumi, et al, US Patent US-4667006-A, 1987                                                                                                                    |
| W(CO) <sub>6</sub> +YΦ                                                                                                         | Soluble polymer                                    | A linear polyene structure is declared. There are $-C\equiv C-H$ groups                                               | [135]<br>135. Ai, H.; Koizumi, et al, US Patent US-4667006-A, 1987                                                                                                                    |
| [Co <sub>2</sub> (CO) <sub>8</sub> ] <sub>2</sub> :Ph-C≡C-C≡C-Ph                                                               | Cross-linked polyene with pendants<br>-Ph-C≡C-H    | -                                                                                                                     | [110,111]<br>110. Misin, V.M.; et al. <i>ChemistrySelect</i> <b>2022</b> , 7, e202103612, doi:10.1002/slct.202103612.<br>111. Glagolev, N.N.; et al. Aghveran, USSR, 1984; pp. 30–31. |
| Probably, NbCl <sub>5</sub>                                                                                                    | Insoluble polymer                                  | -                                                                                                                     | [112]<br>112. Srinivasan, R.; et al. <i>Polym. Bull.</i> <b>1988</b> , 20, doi:10.1007/BF00255737.                                                                                    |
| WCl <sub>6</sub>                                                                                                               | Soluble polymer. After 30 minutes a gel is formed. | A linear structure is declared. There are $-C\equiv C-H$ groups                                                       | [135]<br>135. Ai, H.; Koizumi, et al, US Patent US-4667006-A, 1987                                                                                                                    |
| Probably one of the catalysts TaX <sub>5</sub> -Ph <sub>4</sub> Sn, (X=Cl, Br); TaBr <sub>5</sub> , CpCo(CO) <sub>2</sub> - hv | Insoluble polymer                                  | -                                                                                                                     | [21]<br>21. Häußler, M.; et al. <i>C. R. Chim.</i> <b>2003</b> , 6, 833–842, doi: 10.1016/j.crci.2003.06.003.                                                                         |
| TaCl <sub>5</sub> /Ph <sub>4</sub> Sn                                                                                          | Insoluble polymer                                  | The polymer contains phenylene fragments and $-C\equiv C-H$ groups                                                    | [116]<br>116. Zukal, A.; et al. <i>Macromol. Chem. Phys.</i> <b>2013</b> , 214, 2016–2026, doi:10.1002/macp.201300317.                                                                |
| WCl <sub>6</sub> /Ph <sub>4</sub> Sn                                                                                           | Polymerization is ineffective                      |                                                                                                                       | [15]<br>15. Slováková, E.; et al. <i>Macromol. Chem. Phys.</i> <b>2014</b> , 215, 1855–1869, doi:10.1002/macp.201400198                                                               |
| MoCl <sub>5</sub> /Ph <sub>4</sub> Sn                                                                                          | Polymerization is ineffective                      |                                                                                                                       | [15]<br>15. Slováková, E.; et al. <i>Macromol. Chem. Phys.</i> <b>2014</b> , 215, 1855–1869, doi:10.1002/macp.201400198                                                               |
| PR <sub>3</sub> (R = Me <sub>2</sub> NO, Et, Ph, Bu)                                                                           | Insoluble polymer                                  | Lack of structure studies.                                                                                            | [119]<br>119. Gasparyan, G.Ts.; et al. <i>Armianskij himicheskij zhurnal</i> <b>1988</b> , 41, 716–717.                                                                               |
| Electrically initiated anionic polymerization                                                                                  | Soluble polymer                                    | There are probably branches.                                                                                          | [121]<br>121. Grovu-Ivanoiu, M.; et al. <i>Makromol. Chem.</i> <b>1985</b> , 186, 2247–2254, doi: 10.1002/macp.1985.021861105.                                                        |
| In CH <sub>3</sub> NH <sub>2</sub> medium at 260°C                                                                             | Insoluble polymer                                  | They declare the presence of phenylene fragments and the absence of $-C\equiv C-H$ groups. Lack of structure studies. | [122]<br>122. Sergeev, V.A.; et al. <i>Vysokomol. Soedin., Ser. B</i> <b>1977</b> , 19, 899–903.                                                                                      |

|                                                                                                     |                                                                                  |                                                                    |                                                                                                                                                                                                                                                                                                                                                                                                                                                                                                                                                                                                               |
|-----------------------------------------------------------------------------------------------------|----------------------------------------------------------------------------------|--------------------------------------------------------------------|---------------------------------------------------------------------------------------------------------------------------------------------------------------------------------------------------------------------------------------------------------------------------------------------------------------------------------------------------------------------------------------------------------------------------------------------------------------------------------------------------------------------------------------------------------------------------------------------------------------|
| n-BuLi                                                                                              | Linear polymer                                                                   | Each polymer unit contains $-C\equiv C-H$ groups                   | [33,124–126]<br>33. Misin, V.M.; et al. <i>Polymers</i> <b>2022</b> , <i>14</i> , 900, doi:10.3390/polym14050900.<br>124. Misin, V.M.; et al. <i>Vysokomol. Soedin., Ser. B</i> <b>1981</b> , <i>23</i> , 130–131.<br>125. Glagolev, N.N.; et al. Pat. SU-910662-A1, 1981.<br>1262. Glagolev, N.N.; et al. <i>Sov. J. Chem. Phys.</i> <b>1990</b> , <i>5</i> , 1628–1640.                                                                                                                                                                                                                                     |
| n-BuLi                                                                                              | Linear polymer                                                                   | Modification of polymers with $Co_2(CO)_8$ , $B_{10}H_{14}$ , CuCl | [29,31–33]<br>29. Glagolev, N.N.; et al.; Yerevan, USSR, 1984; p. 211.<br>31. Misin, V.M.; et al. <i>Russ J Appl Chem</i> <b>2007</b> , <i>80</i> , 1910–1913, doi:10.1134/S1070427207110262.<br>32. Misin, V.M.; et al. <i>Vestn. Kazan. Tekhnol. Univ.</i> <b>2016</b> , <i>19</i> , 50–59.<br>33. Misin, V.M.; et al. <i>Polymers</i> <b>2022</b> , <i>14</i> , 900, doi:10.3390/polym14050900.                                                                                                                                                                                                            |
| n-BuLi                                                                                              | Linear polymer                                                                   | Synthesis of skin layers by vacuum deposition of a polymer.        | [127,128]<br>127. Misin, V.M.; et al.; Gomel, 1990; pp. 83–84.<br>128. Misin, V.M.; et al. <i>Russ J Appl Chem</i> <b>2006</b> , <i>79</i> , 1325–1328, doi: 10.1134/S1070427206080210.                                                                                                                                                                                                                                                                                                                                                                                                                       |
| n-BuLi                                                                                              | Linear polymer                                                                   | Modification of industrial oligoetheracrylates                     | [33,130–132]<br>33. Misin, V.M.; et al. <i>Polymers</i> <b>2022</b> , <i>14</i> , 900, doi:10.3390/polym14050900.<br>130. Misin, V.M et al. In <i>Monomers, Oligomers, Polymers, Composites and Nanocomposites Research: Synthesis, Properties and Applications</i> (Polymer Yearbook, Volume 23); Polymer Science and Technology; NOVA science publishers, 2010; Vol. 23 ISBN 978-1-60876-029-9.<br>131. Misin, V.M.; et al. <i>Russ J Appl Chem</i> <b>2008</b> , <i>81</i> , 2008–2013, doi:10.1134/S107042720811027X.<br>132. Misin, V.M.; et al. <i>Oxid. Commun.</i> <b>2011</b> , <i>34</i> , 888–899. |
| n-BuLi                                                                                              | Linear polymer                                                                   | Modification of industrial carbon fibers.                          | [33,133,134]<br>33. Misin, V.M.; et al. <i>Polymers</i> <b>2022</b> , <i>14</i> , 900, doi:10.3390/polym14050900.<br>133. Kazakov, M.E et al. <i>Dokl. AN SSSR</i> <b>1986</b> , <i>287</i> , 1139–1141.<br>134. Cherkashin, M.I.; et al.; Aghveran, USSR, 1984; pp. 87–88.                                                                                                                                                                                                                                                                                                                                   |
| $(CO)_5.M \begin{array}{c} \nearrow R_5 \\ =C \\ \searrow R_6 \end{array}$ Carbenes, where M= Mo, W | They declare the linear polymer.                                                 | There are $-C\equiv C-H$ groups                                    | [135]<br>131. Ai, H.; Koizumi, et al, US Patent US-4667006-A, 1987.                                                                                                                                                                                                                                                                                                                                                                                                                                                                                                                                           |
| Mo-Schrock carbene                                                                                  | Polymerization is ineffective                                                    |                                                                    | [15]<br>15. Slováková, E.; et al. <i>Macromol. Chem. Phys.</i> <b>2014</b> , <i>215</i> , 1855–1869, doi:10.1002/macp.201400198                                                                                                                                                                                                                                                                                                                                                                                                                                                                               |
| $CoHal_2 \cdot 2PBu_3$ (Hal= Cl, Br)                                                                | The linear structure gradually turns into a branched one.                        | -                                                                  | [137]<br>137. Lei, Z.; et al. <i>Polym J</i> <b>1998</b> , <i>30</i> , 879–882, doi:10.1295/polymj.30.879.                                                                                                                                                                                                                                                                                                                                                                                                                                                                                                    |
| $CoHal_2 \cdot 2PBu_3$ (Hal= Cl, Br)                                                                | The structure of the polymer is not known, because no synthesis conditions given | Study of non-linear optical properties                             | [134]<br>134. Yang, Q.; et al. <i>Chinese Phys. Lett.</i> <b>1998</b> , <i>15</i> , 189–191, doi:10.1088/0256-307X/15/3/013.                                                                                                                                                                                                                                                                                                                                                                                                                                                                                  |
| <b>Poly-o-DEB</b>                                                                                   |                                                                                  |                                                                    |                                                                                                                                                                                                                                                                                                                                                                                                                                                                                                                                                                                                               |
| $AlEt_nCl_{3-n}/TiCl_4$ , $AlEt_nCl_{3-n}/Ti(acac)_3$ (where n =                                    | Soluble or in-                                                                   | Molecules con-                                                     | [145]                                                                                                                                                                                                                                                                                                                                                                                                                                                                                                                                                                                                         |

|                                                                                                                                                                                                                                 |                                                    |                                                                                                                          |                                                                                                                                                                                                                                  |
|---------------------------------------------------------------------------------------------------------------------------------------------------------------------------------------------------------------------------------|----------------------------------------------------|--------------------------------------------------------------------------------------------------------------------------|----------------------------------------------------------------------------------------------------------------------------------------------------------------------------------------------------------------------------------|
| 1,2,3), Al(i-Bu) <sub>3</sub> /TiCl <sub>4</sub> , Al(i-Bu) <sub>3</sub> /Ti(acac) <sub>2</sub><br>TiCl <sub>4</sub> , AlEt <sub>2</sub> Cl, BF <sub>3</sub> OEt <sub>2</sub> , AlCl <sub>3</sub> , AlEtCl <sub>2</sub><br>AIBN | soluble polymers depending on synthesis conditions | tain units of various structures. The number of –C≡C–H groups remaining in the polymer depends on the type of initiator. | 145. Aso, C.; et al. <i>Macromolecular Chemistry and Physics</i> <b>1972</b> , 151, 265–274, doi:10.1002/macp.1972.021510120.                                                                                                    |
| Thermal polymerization                                                                                                                                                                                                          | Insoluble poly(1,4-naphthylene)                    | -                                                                                                                        | [146 147]<br>146. John, J.A.; et al. <i>J. Am. Chem. Soc.</i> <b>1994</b> , 5011–5012, doi:10.1021/ja00090a066.<br>147. John, J.A.; et al. <i>Tetrahedron</i> <b>1997</b> , 53, 15515–15534, doi: 10.1016/S0040-4020(97)00977-0. |
| Thermal polymerization                                                                                                                                                                                                          | Insoluble polymer                                  | Molecules contain units of various structures. There are –C≡C–H groups                                                   | [148]<br>148. Johnson, J.P.; et al. <i>J. Am. Chem. Soc.</i> <b>2003</b> , 125, 14708–14709, doi:10.1021/ja035695t.                                                                                                              |
| Thermal melt curing                                                                                                                                                                                                             | -                                                  | The activation energies of the curing reaction o-, m-, p-DEB are compared                                                | [62]<br>62. Sastri, S.B.; et al. <i>Macromolecules</i> <b>1993</b> , 26, 6171–6174, doi:10.1021/ma00075a005.                                                                                                                     |
| MoCl <sub>5</sub> , WCl <sub>6</sub> , MoCl <sub>5</sub> /(n-Bu) <sub>4</sub> Sn, WCl <sub>6</sub> /(n-Bu) <sub>4</sub> Sn, WCl <sub>6</sub> /EtAlCl <sub>2</sub> , MoCl <sub>5</sub> /EtAlCl <sub>2</sub>                      | Poor solubility in CHCl <sub>3</sub> and THF       | Molecules contain indenylene units                                                                                       | [149]<br>149. Kim D.J.; et al. <i>Polymer (Korea)</i> <b>1994</b> , 18, 297–302.                                                                                                                                                 |
| [(nbd)RhCl] <sub>2</sub> /Et <sub>3</sub> N, where nbd=2,5-norbornadiene                                                                                                                                                        | Insoluble polymer                                  | Molecules contain indenylene units and –C≡C–H groups                                                                     | [17]<br>17. Zhang, W.; et al. <i>Polymer</i> <b>2006</b> , 47, 2956–2961, doi: 10.1016/j.polymer.2006.03.011.                                                                                                                    |
| TaCl <sub>5</sub> /Ph <sub>4</sub> Sn                                                                                                                                                                                           | Insoluble polymer                                  | The polymer contains phenylene fragments and no –C≡C–H groups                                                            | [17]<br>17. Zhang, W.; et al. <i>Polymer</i> <b>2006</b> , 47, 2956–2961, doi: 10.1016/j.polymer.2006.03.011.                                                                                                                    |
| <b>Poly-m-DEB</b>                                                                                                                                                                                                               |                                                    |                                                                                                                          |                                                                                                                                                                                                                                  |
| Probably, [(RO) <sub>3</sub> P] <sub>n</sub> CoHal, (where R = AlkC <sub>56</sub> , Hal = Cl, Br, I)                                                                                                                            | Insoluble polymer                                  | Structure not discussed                                                                                                  | [152]<br>152. Sergeyev, V.A.; et al. <i>Polymer Science U.S.S.R.</i> <b>1980</b> , 22, 2130–2135, doi: 10.1016/0032-3950(80)90075-1.                                                                                             |
| WCl <sub>6</sub> + PhC≡C–H                                                                                                                                                                                                      | Soluble polymer                                    | A linear polyene structure is declared. There are –C≡C–H groups                                                          | [135]<br>131. Ai, H.; Koizumi, et al, US Patent US-4667006-A, 1986.                                                                                                                                                              |
| Ni(Acac) <sub>2</sub> :Ph <sub>3</sub> P                                                                                                                                                                                        | Soluble polymer                                    | The polymer contained 10.1 %wt. terminal acetylene groups                                                                | [153]<br>153. Watson, A.S. US Patent US-3993711-A, 1976.                                                                                                                                                                         |



|                                                                                                                                                                                                                         |                                                                                                                           |                                                                                                                  |                                                                                                                                                                                                                                                                                                |
|-------------------------------------------------------------------------------------------------------------------------------------------------------------------------------------------------------------------------|---------------------------------------------------------------------------------------------------------------------------|------------------------------------------------------------------------------------------------------------------|------------------------------------------------------------------------------------------------------------------------------------------------------------------------------------------------------------------------------------------------------------------------------------------------|
| Ni catalyst, probably (Acac) <sub>2</sub> Ni/2Ph <sub>3</sub> P                                                                                                                                                         | Structure of polymer not discussed                                                                                        | -                                                                                                                | [154–156]<br>150. Zaldivar, R.J.; et al. <i>Carbon</i> <b>1991</b> , 29, 1145–1153, doi: 10.1016/0008-6223(91)90032-E.<br>155. Zaldivar, R.J.; et al. <i>SAMPE J.</i> <b>1992</b> , 27, 32.<br>156. Binegar, G.A.; et al; Space Systems Division Air Force Systems Command: Los Angeles, 1989. |
| Thermal melt curing                                                                                                                                                                                                     | -                                                                                                                         | The activation energies of the curing reaction o-, m-, p-DEB are compared                                        | [62]<br>62. Sastri, S.B.; et al. <i>Macromolecules</i> <b>1993</b> , 26, 6171–6174, doi:10.1021/ma00075a005.                                                                                                                                                                                   |
| Thermal and catalytic polymerization. Conditions not specified                                                                                                                                                          | Insoluble polymers                                                                                                        | Cy-clo-trimerization occurs. There are groups –C≡C–H                                                             | [162]<br>162. Cao, J.; et al. <i>Mater. rev.</i> <b>2001</b> , 08, 64–66.                                                                                                                                                                                                                      |
| Ni-catalytic polymerization. Conditions not specified                                                                                                                                                                   | Insoluble polymers                                                                                                        | Cy-clo-trimerization occurs. There are groups –C≡C–H                                                             | [107,108]<br>107. Ding, X.; et al. <i>J. East China Univ. Sci. Technol.</i> <b>2001</b> , 27, 161–164.<br>108. Ding, X.; et al. <i>J. Funct. Polym.</i> <b>2001</b> , 14, 105–108.                                                                                                             |
| Probably one of the catalysts TaX <sub>5</sub> -Ph <sub>4</sub> Sn, (X=Cl, Br); TaBr <sub>5</sub> , CpCo(CO) <sub>2</sub> – hv                                                                                          | Insoluble polymer                                                                                                         |                                                                                                                  | [21]<br>21. Häußler, M.; et al. <i>C. R. Chim.</i> <b>2003</b> , 6, 833–842, doi: 10.1016/j.crci.2003.06.003                                                                                                                                                                                   |
| [Rh(cod)acac] and [Rh(nbd)acac] (cod: cycloocta-1,5-diene; nbd: norborna-2,5-diene; acac: acetylacetonate)                                                                                                              | Crosslinked polymer                                                                                                       | Cross-linking with arylene linkers. Polymers contain –C≡C–H groups                                               | [14]<br>14. Hanková, V.; et al. <i>Macromol. Rapid Commun.</i> <b>2012</b> , 33, 158–163, doi:10.1002/marc.201100599.                                                                                                                                                                          |
| Rh(nbd)acac                                                                                                                                                                                                             | Crosslinked polymer                                                                                                       | Cross-linking with arylene linkers. Polymers contain –C≡C–H groups. Alkyne-azide click reaction was carried out. | [15]<br>15. Slováková, E.; et al. <i>Macromol. Chem. Phys.</i> <b>2014</b> , 215, 1855–1869, doi:10.1002/macp.201400198.                                                                                                                                                                       |
| Rh-based catalyst                                                                                                                                                                                                       | -                                                                                                                         | Review                                                                                                           | [9]<br>9. Sedláček, J.; et al. <i>Polym. Rev.</i> <b>2017</b> , 57, 31–51, doi: 10.1080/15583724.2016.1144207.                                                                                                                                                                                 |
| Pd(OAc) <sub>2</sub> /Ph <sub>3</sub> P/methanesulfonic acid Ultrasound was used to homogenize the reaction system. A single-stage one-pot self-encapsulating synthesis of a heterogeneous Pd catalyst was carried out. | Insoluble polymers. Simultaneous formation of cross-linked chains and encapsulation of the Pd catalyst with the formation | Assessment of catalytic activity in the Suzuki–Miyaura, Stille, allylic arylation,                               | [13]<br>13. Dong, Z.; et al. <i>Adv. Synth. Catal.</i> <b>2014</b> , 356, 3401–3414, doi: 10.1002/adsc.201400520.                                                                                                                                                                              |

|                                                                                                                                                             |                                 |                                                                                                                                                                                            |                                                                                                                           |
|-------------------------------------------------------------------------------------------------------------------------------------------------------------|---------------------------------|--------------------------------------------------------------------------------------------------------------------------------------------------------------------------------------------|---------------------------------------------------------------------------------------------------------------------------|
|                                                                                                                                                             | of a heterogeneous Pd catalyst. | and Mizoroki–Heck reactions                                                                                                                                                                |                                                                                                                           |
| Pd(OAc) <sub>2</sub> /α,α′-bis(di- <i>t</i> -butylphosphino)- <i>o</i> -xylene/methanesulfonic acid. Ultrasound was used to homogenize the reaction system. | Insoluble polymers              | Probably, there are –C≡C–H groups. Carbonization was carried out in the presence of KOH. It was recommended to use carbonizates as electrode materials in supercapacitors and as sorbents. | [164]<br>164. Grundy, M.; et al. <i>J. Mater. Chem. A</i> <b>2014</b> , <i>2</i> , 20316–20330, doi:10.1039/C4TA04038D.   |
| Composite m-DEB/SBA-15 template cured in an oven and carbonized                                                                                             | Insoluble polymers              | Ordered heat-resistant mesoporous coals with a very narrow pore size distribution have been synthesized.                                                                                   | [165]<br>165. Zhang, B.; et al. <i>Mater. Lett.</i> <b>2017</b> , <i>189</i> , 317–320, doi:10.1016/j.matlet.2016.11.008. |

<sup>a</sup> information is taken from the primary sources indicated in the last column
